# Supplementary material
Source: MDPI journal article supplement (https://www.mdpi.com/2072-4292/13/9/1740)
Supplement: s1 [file s1]

## Supplementary material

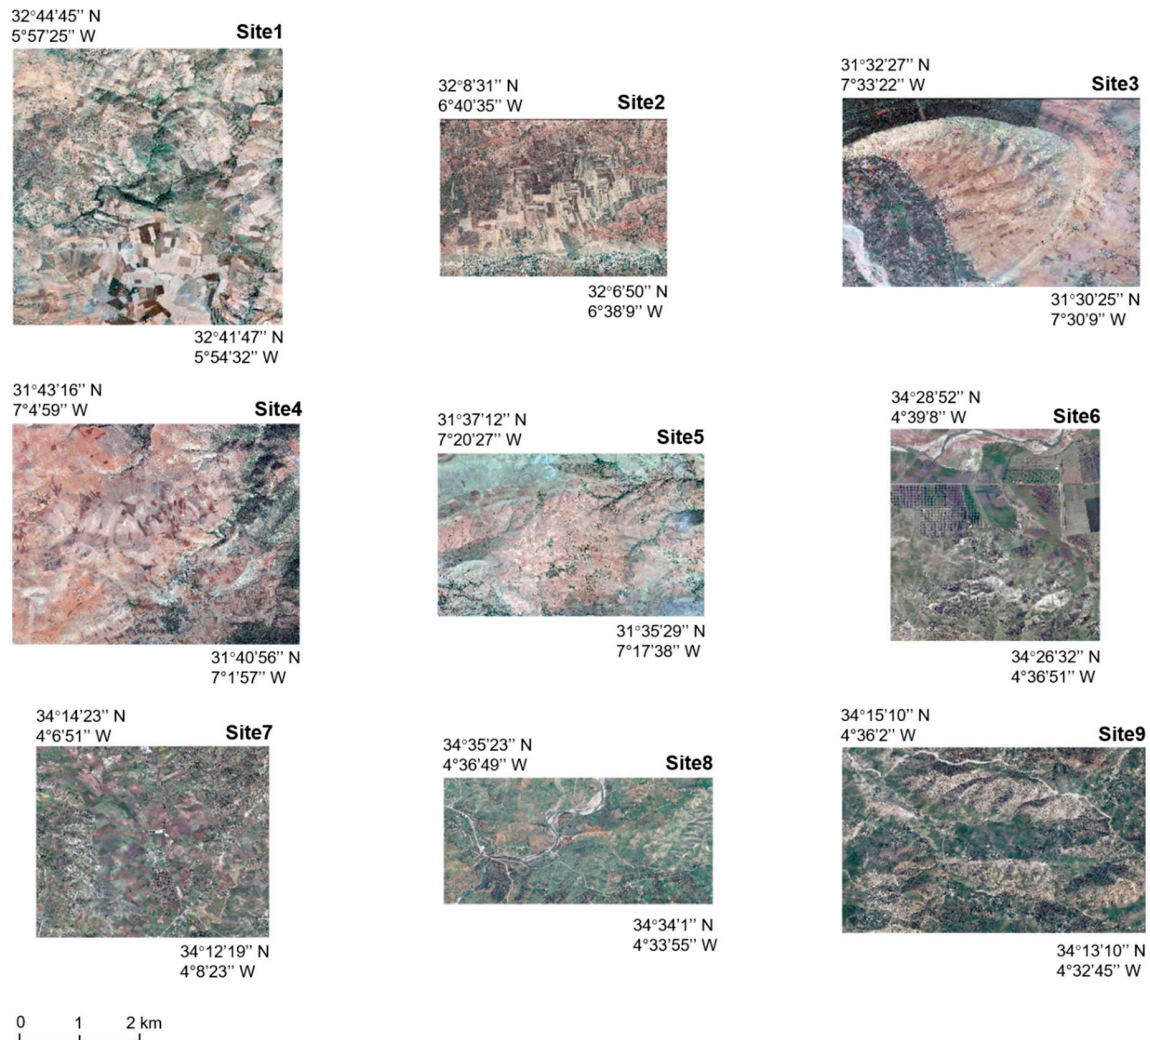

Figure S1. DG imagery of nine study sites

Table S1. Elevation information of study areas (unit: m)

| Region    | Site | Max  | Min | Mean | Std   |
|-----------|------|------|-----|------|-------|
| Semi-arid | 1    | 829  | 653 | 730  | 24.82 |
|           | 2    | 930  | 800 | 854  | 26.55 |
|           | 3    | 1138 | 828 | 928  | 61.89 |
|           | 4    | 1419 | 997 | 1190 | 46.82 |
|           | 5    | 1204 | 938 | 1121 | 35.29 |
| Sub-humid | 6    | 629  | 239 | 340  | 91.25 |
|           | 7    | 376  | 152 | 215  | 40.18 |
|           | 8    | 497  | 304 | 374  | 37.80 |
|           | 9    | 794  | 334 | 558  | 96.68 |

Table S2. Acquisition dates of satellite imagery

| Region    | Site | DG (single date) | Planet (from Sep 2018 to Aug 2019)                                                                                                             |
|-----------|------|------------------|------------------------------------------------------------------------------------------------------------------------------------------------|
| Semi-arid | 1    | 2018-03-26       | 2018-09-26, 2018-10-13, 2018-11-27, 2018-12-31, 2019-01-26, 2019-02-28, 2019-03-29, 2019-04-30, 2019-05-31, 2019-06-29, 2019-07-25, 2019-08-20 |
|           | 2    | 2018-08-23       | 2018-09-24, 2018-10-24, 2018-11-30, 2018-12-26, 2019-01-30, 2019-02-28, 2019-03-29, 2019-04-27, 2019-05-28, 2019-06-29, 2019-07-31, 2019-08-27 |
|           | 3    | 2019-04-05       | 2018-09-29, 2018-10-31, 2018-11-28, 2018-12-30, 2019-01-30, 2019-02-24, 2019-03-20, 2019-04-11, 2019-05-28, 2019-06-25, 2019-07-24, 2019-08-16 |
|           | 4    | 2019-09-05       | 2018-09-29, 2018-10-13, 2018-11-30, 2018-12-26, 2019-01-26, 2019-02-24, 2019-03-22, 2019-04-16, 2019-05-28, 2019-06-29, 2019-07-27, 2019-08-31 |
|           | 5    | 2019-10-04       | 2018-09-24, 2018-10-16, 2018-11-23, 2018-12-27, 2019-01-29, 2019-02-23, 2019-03-25, 2019-04-29, 2019-05-31, 2019-06-29, 2019-07-25, 2019-08-20 |
| Sub-humid | 6    | 2019-03-28       | 2018-09-30, 2018-10-24, 2018-11-28, 2018-12-29, 2019-01-18, 2019-02-26, 2019-03-23, 2019-04-28, 2019-05-30, 2019-06-29, 2019-07-31, 2019-08-30 |
|           | 7    | 2019-04-27       | 2018-09-28, 2018-10-25, 2018-11-28, 2018-12-29, 2019-01-14, 2019-02-24, 2019-03-29, 2019-04-29, 2019-05-25, 2019-06-29, 2019-07-27, 2019-08-28 |
|           | 8    | 2019-03-28       | 2018-09-30, 2018-10-25, 2018-11-30, 2018-12-23, 2019-01-14, 2019-02-26, 2019-03-22, 2019-04-29, 2019-05-31, 2019-06-24, 2019-07-31, 2019-08-30 |
|           | 9    | 2019-05-02       | 2018-09-30, 2018-10-25, 2018-11-30, 2018-12-27, 2019-01-14, 2019-02-28, 2019-03-29, 2019-04-30, 2019-05-27, 2019-06-20, 2019-07-28, 2019-08-25 |

Table S3. Hyperparameters of different models

| Models                       | Platform | Epoch | Learning Rate<br>(initial) | Learning rate decay | Batch Size |
|------------------------------|----------|-------|----------------------------|---------------------|------------|
| Grid sampling<br>(semi-arid) | DG       | 150   | 0.05                       | 0.9 per 5 epochs    | 64         |
| Grid sampling<br>(sub-humid) | DG       | 150   | 0.04                       | 0.9 per 5 epochs    | 32         |
| Region sampling<br>(site1)   | DG       | 150   | 0.025                      | 0.9 per 5 epochs    | 32         |
| Region sampling<br>(site2)   | DG       | 150   | 0.05                       | 0.9 per 5 epochs    | 32         |
| Region sampling<br>(site3)   | DG       | 150   | 0.05                       | 0.9 per 5 epochs    | 32         |
| Region sampling<br>(site4)   | DG       | 150   | 0.05                       | 0.9 per 5 epochs    | 32         |
| Region sampling<br>(site5)   | DG       | 150   | 0.05                       | 0.9 per 5 epochs    | 32         |
| Region sampling<br>(site6)   | DG       | 150   | 0.05                       | 0.9 per 5 epochs    | 32         |
| Region sampling<br>(site7)   | DG       | 150   | 0.05                       | 0.9 per 5 epochs    | 32         |
| Region sampling<br>(site8)   | DG       | 150   | 0.05                       | 0.9 per 5 epochs    | 32         |
| Region sampling<br>(site9)   | DG       | 150   | 0.05                       | 0.9 per 5 epochs    | 32         |
| CNN<br>(semi-arid)           | Planet   | 150   | 0.005                      | 0.7 per 5 epochs    | 32         |
| CNN<br>(sub-humid)           | Planet   | 150   | 0.0025                     | 0.8 per 5 epochs    | 32         |
| LRCN<br>(semi-arid)          | Planet   | 150   | 0.0003                     | 0.9 per 10 epochs   | 32         |
| LRCN<br>(sub-humid)          | Planet   | 150   | 0.0001                     | 0.9 per 10 epochs   | 64         |
